# Supplementary material for: The COVID-19 Pandemic and Its Impact on Homebound Nursing Students
Source: PubMed Central journal article supplement (PMC7600682; doi:10.3390/ijerph17207383), 2020-10-10
Supplement: ijerph-17-07383-s001.pdf [file ijerph-17-07383-s001.pdf]

## Supplementary Material

**Table S1.** Adapted version of the Student Stress Inventory-Stress Manifestations (SSI-SM) for Nursing Students.

| Items                                           | Not at all | Rarely | Sometimes | Very often | Completely |
|-------------------------------------------------|------------|--------|-----------|------------|------------|
| 1. I feel irritated                             |            |        |           |            |            |
| 2. Food disorders                               |            |        |           |            |            |
| 3. I feel afraid                                |            |        |           |            |            |
| 4. I feel worried                               |            |        |           |            |            |
| 5. I feel anxious                               |            |        |           |            |            |
| 6. I react defensively against others           |            |        |           |            |            |
| 7. I feel burdened                              |            |        |           |            |            |
| 8. I have cold sweats                           |            |        |           |            |            |
| 9. I have itches all over my body               |            |        |           |            |            |
| 10. I feel unable to face university            |            |        |           |            |            |
| 11. I disregard my social relations             |            |        |           |            |            |
| 12. I don't know what to do                     |            |        |           |            |            |
| 13. I have a negative attitude against others   |            |        |           |            |            |
| 14. I have heart palpitations                   |            |        |           |            |            |
| 15. I feel angry                                |            |        |           |            |            |
| 16. I discredit other people                    |            |        |           |            |            |
| 17. I have a stomachache                        |            |        |           |            |            |
| 18. I have difficulties interacting with others |            |        |           |            |            |
| 19. I don't attend university because I am ill  |            |        |           |            |            |

This version has been validated by Simonelli-Muñoz *et al.* (1) from the original version from Fimian *et al.* (2) and the Spanish adaptation by Escobar-Espejo *et al.* (3).

## References

1. Simonelli-Muñoz, A.J.; Balanza, S.; Rivera-Caravaca, J.M.; Vera-Catalán, T.; Lorente, A.M.; Gallego-Gómez, J.I. Reliability and validity of the student stress inventory-stress manifestations questionnaire and its association with personal and academic factors in university students. *Nurse Educ. Today* **2018**, *64*, 156–160, doi:10.1016/j.nedt.2018.02.019.
2. Fimian, M.J.; Fastenau, P.A.; Tashner, J.H.; Cross, A.H. The measure of classroom stress and burnout among gifted and talented students. *Psychol. Sch.* **1989**, *26*, 139–53, doi:10.1002/1520-6807(198904)26:2<139::AID-PITS2310260205>3.0.CO;2-E.
3. Escobar-Espejo, M.; Blanca, M.J.; Fernandez-Baena, F.J.; Trianes Torres, M.V. Spanish adaptation of the Stress Manifestations Scale of the Student Stress Inventory (SSI-SM). *Psicothema* **2011**, *23*, 475–485.
